# Supplementary material
Source: publisher figshare collection journal article supplement (https://sage.figshare.com/ndownloader/files/13748333)
Supplement: Supplementary file 1 [file 13748333]

## **Appendix**

### ***Definition of variables***

- Cost of new debt: Three different specifications are used: Offer Yield, Net Interest Cost and Spread to Treasury.
  - Offer Yield: The yield offered to investors at the time of bond issuance.
  - Net Interest Cost: The overall interest expense that is associated with the bond and is based on the average coupon rate weighted to years of maturity adjusted for any associated discounts or premiums.
  - Spread to Treasury: The difference between the bond yield and a risk-free treasury security yield with similar maturity.

### **VIOLATION**

- VIOLATION: This is a binary variable measured by: VIOL, [Viol<sub>t</sub>, Viol<sub>t-1</sub>], and [Viol =1, Viol >1].
  - Viol<sub>t</sub>: Incidence of violation occurred in the bond-issue quarter
  - Viol<sub>t-1</sub>: Incidence of violation occurred in the quarter preceding the bond-issue quarter
  - Viol =1: Firm reported exactly one violation
  - Viol >1: Firm reported more than one violation
  - Viol = n: total number of violations reported by the firm

### **BORROWER CHARACTERISTICS**

- Z-SCORE: The z-score for the issuer calculated separately for manufacturing and non-manufacturing firms.
- SIZE: The natural log of the book value of the assets of the borrower adjusted for inflation in year-2000 dollars. This controls for the cross-sectional variation in issuer size in the sample.
- LEVERAGE: Ratio of book value of long-term debt plus the long-term debt in current liabilities to the book value of total assets.

- **COVERAGE RATIO:** Calculated as  $(\frac{EBITDA}{Interest\ Expenses})$ .
- **TANGIBILITY:** Ratio of property, plants and equipment to total assets.
- **MARKET-to-BOOK:** Ratio of market value of the firm to the book value of the firm.
- **CURRENT RATIO:** Ratio of current assets to current liabilities.

## **BOND CHARACTERISTICS**

- **S&P RATING:** The Standard & Poor's ratings of the new bond issue converted to a numerical value using the following scheme. S&P Rating = 22 if S&P Rating = "AAA"; S&P Rating = 21 if S&P Rating = "AA+"; S&P Rating = 20 if S&P Rating = "AA"; S&P Rating = 19 if S&P Rating = "AA-"; S&P Rating = 18 if S&P Rating = "A+"; S&P Rating = 17 if S&P Rating = "A"; S&P Rating = 16 if S&P Rating = "A-"; S&P Rating = 15 if S&P Rating = "BBB+"; S&P Rating = 14 if S&P Rating = "BBB"; S&P Rating = 13 if S&P Rating = "BBB-"; S&P Rating = 12 if S&P Rating = "BB+"; S&P Rating = 11 if S&P Rating = "BB"; S&P Rating = 10 if S&P Rating = "BB-"; S&P Rating = 9 if S&P Rating = "B+"; S&P Rating = 8 if S&P Rating = "B"; S&P Rating = 7 if S&P Rating = "B-"; S&P Rating = 6 if S&P Rating = "CCC+"; S&P Rating = 5 if S&P Rating = "CCC"; S&P Rating = 4 if S&P Rating = "CCC-"; S&P Rating = 3 if S&P Rating = "CC"; S&P Rating = 2 if S&P Rating = "C"; S&P Rating = 1 if S&P Rating = "D";
- **LOG MATURITY:** The natural log of the maturity of the bond issue in months.
- **LOG AMOUNT:** The natural log of the loan issue value.

## **CONTROL**

- **Control<sub>k</sub>:** These are other control variables and include dummy variables for the year- quarter of the bond issue and the industry of the borrower.
